# Supplementary material for: Interim results of a prospective, randomized, open-label, Phase 3 study of the long-term safety and efficacy of lasmiditan for acute treatment of migraine (the GLADIATOR study)
Source: PubMed Central journal article supplement — Cephalalgia. 2019 Aug 21;39(11):1343–57. doi: 10.1177/0333102419864132 (PMC6779019; doi:10.1177/0333102419864132), 2019-08-21
Supplement: CEP864132_Supplemental_material_tables.pdf [file CEP864132_Supplemental_material_tables.pdf]

## The Migraine Disability Assessment (MIDAS) Questionnaire (1-3)

- On how many days in the past 3 months did you miss work or school because of your headaches?
- How many days in the past 3 months was your productivity at work or school reduced by half or more because of your headaches? (Do not include days you counted in question 1 where you missed work or school)
- On how many days in the past 3 months did you not do household work (such as housework, home repairs and maintenance, shopping, caring for children and relatives) because of your headaches?
- How many days in the past 3 months was your productivity in household work reduced by half or more because of your headaches? (Do not include days you counted in question 3 where you did not do household work)
- On how many days in the past 3 months did you miss family, social or leisure activities because of your headaches?

The MIDAS Total score is the sum of the 5 questions above, with 0-5 = little or no disability, 6-10 = mild disability, 11-20 = moderate disability, and  $\geq 21$  = severe disability.

Two additional questions assess the number of headache days and severity of headaches:

- On how many days in the past 3 months did you have a headache? (If a headache lasted more than 1 day, count each day)
- On a scale of 0 to 10, on average how painful were these headaches? (where 0 = no pain at all, and 10 = pain as bad as it can be)

### References

1. Stewart WF, Lipton RB, Kolodner K, et al. Reliability of the migraine disability assessment score in a population-based sample of headache sufferers. *Cephalalgia* 1999; 19: 107-114.
2. Stewart WF, Lipton RB, Whyte J, et al. An international study to assess reliability of the Migraine Disability Assessment (MIDAS) score. *Neurology* 1999; 53 :988-994.
3. Stewart WF, Lipton RB, Dowson AJ, et al. Development and testing of the Migraine Disability Assessment (MIDAS) Questionnaire to assess headache-related disability. *Neurology* 2001; 56: S20-S28.

**Supplemental Table 1. Medical History (Safety Population)**

| <b>Preferred Term,<sup>a</sup> n (%)</b> | <b>Lasmiditan<br/>100 mg<br/>N = 963</b> | <b>Lasmiditan<br/>200 mg<br/>N = 1015</b> | <b>All Patients<br/>N = 1978</b> |
|------------------------------------------|------------------------------------------|-------------------------------------------|----------------------------------|
| Seasonal allergy                         | 223 (23.2)                               | 260 (25.6)                                | 483 (24.4)                       |
| Depression                               | 215 (22.3)                               | 221 (21.8)                                | 436 (22.0)                       |
| Drug hypersensitivity                    | 183 (19.0)                               | 202 (19.9)                                | 385 (19.5)                       |
| Anxiety                                  | 184 (19.1)                               | 191 (18.8)                                | 375 (19.0)                       |
| Hypertension                             | 167 (17.3)                               | 193 (19.0)                                | 360 (18.2)                       |
| Hysterectomy <sup>b</sup>                | 128 (15.6)                               | 143 (16.5)                                | 271 (16.1)                       |
| Headache                                 | 155 (16.1)                               | 157 (15.5)                                | 312 (15.8)                       |
| Gastroesophageal reflux syndrome         | 145 (15.1)                               | 155 (15.3)                                | 300 (15.2)                       |
| Female sterilization <sup>c</sup>        | 127 (15.5)                               | 130 (15.0)                                | 257 (15.2)                       |
| Asthma                                   | 127 (13.2)                               | 134 (13.2)                                | 261 (13.2)                       |
| Insomnia                                 | 122 (12.7)                               | 119 (11.7)                                | 241 (12.2)                       |
| Back pain                                | 109 (11.3)                               | 130 (12.8)                                | 239 (12.1)                       |
| Postmenopause <sup>b</sup>               | 96 (11.7)                                | 91 (10.5)                                 | 187 (11.1)                       |
| Obesity                                  | 106 (11.0)                               | 111 (10.9)                                | 217 (11.0)                       |

Abbreviation: MedDRA: Medical Dictionary for Regulatory Activities.

Reported by  $\geq 10\%$  of patients in either treatment group.

<sup>a</sup> Medical history coded using MedDRA Version 21.0.

<sup>b</sup> Percentages calculated using the number of women as denominator:  $n = 822$  for 100 mg;  $n = 866$  for 200 mg;  $n = 1688$  overall.

**Supplemental Table 2. Frequently Reported Treatment-Emergent Adverse Events by Migraine Attack in Patients Who Treated  $\geq 5$  Attacks (Safety Population)**

| TEAE, <i>n</i> (%) <sup>a,b</sup> | Lasmiditan 100 mg ( <i>N</i> = 560) |          |          |          |          | Lasmiditan 200 mg ( <i>N</i> = 566) |          |          |          |          |
|-----------------------------------|-------------------------------------|----------|----------|----------|----------|-------------------------------------|----------|----------|----------|----------|
|                                   | Migraine Attack                     |          |          |          |          | Migraine Attack                     |          |          |          |          |
|                                   | #1                                  | #2       | #3       | #4       | #5       | #1                                  | #2       | #3       | #4       | #5       |
| Dizziness                         | 41 (7.3)                            | 29 (5.2) | 26 (4.6) | 22 (3.9) | 21 (3.8) | 53 (9.4)                            | 39 (6.9) | 38 (6.7) | 33 (5.8) | 27 (4.8) |
| Somnolence                        | 25 (4.5)                            | 14 (2.5) | 14 (2.5) | 6 (1.1)  | 6 (1.1)  | 37 (6.5)                            | 18 (3.2) | 11 (1.9) | 13 (2.3) | 10 (1.8) |
| Paresthesia                       | 10 (1.8)                            | 3 (0.5)  | 7 (1.3)  | 1 (0.2)  | 2 (0.4)  | 27 (4.8)                            | 17 (3.0) | 18 (3.2) | 13 (2.3) | 16 (2.8) |
| Fatigue                           | 15 (2.7)                            | 8 (1.4)  | 10 (1.8) | 7 (1.3)  | 4 (0.7)  | 16 (2.8)                            | 14 (2.5) | 12 (2.1) | 9 (1.6)  | 7 (1.2)  |
| Nausea                            | 5 (0.9)                             | 2 (0.4)  | 1 (0.2)  | 1 (0.2)  | 0        | 12 (2.1)                            | 2 (0.4)  | 3 (0.5)  | 4 (0.7)  | 6 (1.1)  |
| Asthenia                          | 6 (1.1)                             | 2 (0.4)  | 3 (0.5)  | 4 (0.7)  | 3 (0.5)  | 6 (1.1)                             | 3 (0.5)  | 4 (0.7)  | 2 (0.4)  | 3 (0.5)  |
| Hypoesthesia                      | 3 (0.5)                             | 1 (0.2)  | 0        | 1 (0.2)  | 1 (0.2)  | 4 (0.7)                             | 0        | 3 (0.5)  | 2 (0.4)  | 3 (0.5)  |
| Vertigo                           | 3 (0.5)                             | 2 (0.4)  | 2 (0.4)  | 1 (0.2)  | 1 (0.2)  | 4 (0.7)                             | 2 (0.4)  | 4 (0.7)  | 3 (0.5)  | 1 (0.2)  |
| Lethargy                          | 3 (0.5)                             | 1 (0.2)  | 2 (0.4)  | 2 (0.4)  | 5 (0.9)  | 3 (0.5)                             | 6 (1.1)  | 5 (0.9)  | 4 (0.7)  | 3 (0.5)  |

Abbreviations: AE: adverse event; MedDRA: Medical Dictionary for Regulatory Activities; TEAE: treatment-emergent adverse event.

<sup>a</sup> An AE that occurred or worsened within 48 hours after the last dose (either the first or the second dose) of lasmiditan was considered treatment emergent.

<sup>b</sup> AEs were coded using MedDRA Version 21.0. Patients are counted only once within each preferred term.
